# Supplementary material for: Prospective blinded surveillance screening of Swedish women with increased hereditary risk of breast cancer
Source: Breast Cancer Res Treat. 2018 Jan 9;168(3):655–66. doi: 10.1007/s10549-017-4639-0 (PMC5842249; doi:10.1007/s10549-017-4639-0)
Supplement: Supplementary file 1 — Supplementary material 1 (XLS 29 kb) [file 10549_2017_4639_MOESM1_ESM.xls]

## Sheet: Blad1
Supplementary Table 1. Family history in the study population in different risk groups
	Family history	n
Risk Group 1 Moderate risk
	2 relatives*, closest 2:nd degree, all ages	21
	2 relatives*, at least one 1:st degree, all > 45 years,	72
	3 relatives*, closest 2:nd degree, all ages	43
	1 first degree relative with breast cancer < 35 years	40
Risk Group 2 High risk
	2 relatives*, at least one first degree, at least one < 45 years	121
	3 relatives*, at least one 1:st degree, all > 45 years	61
	3 relatives* at least one 1:st degree, at least one < 45 years	199
	1 first degree relative with breast and ovarian cancer	1
	Untested but one 1:st degree relative with a BRCA1 or BRCA2 mutation; 50% risk of being a carrier	2
Risk Group 3 History of breast or ovarian cancer
	Own history of breast or ovarian cancer + two relatives* 1:st or second degree > 45 years	9
	Own history of breast or ovarian cancer + one 1:st or second degree* < 45 years	6
	Own history of breast or ovarian cancer + two 1:st or second degree* at least one < 45years	11
Risk Group 4 Very high risk -mutation carrier
	BRCA1 mutation carrier regardless of medical history of breast or ovarian cancer	35
	BRCA2 mutation carrier regardless of medical history of breast or ovarian cancer	9
	PTEN mutation carrier regardless of medical history of breast or ovarian cancer	1
	TP53 mutation carrier regardless of medical history of breast or ovarian cancer	1
*with breast or ovarian cancer in the same family branch and at least one breast cancer case in the family
